# Supplementary material for: Phosphorus addition mitigates N 2 O and CH 4 emissions in N-saturated subtropical forest, SW China
Source: Copernicus journal article supplement (doi:10.5194/bg-2016-470), 2016-11-03
Supplement: Supplementary file 1 [file bg-2016-470-supplement.pdf]

## Supporting Information

Phosphorus addition mitigates N<sub>2</sub>O and CH<sub>4</sub> emissions in an N-saturated subtropical forest, SW China

Longfei Yu<sup>1</sup>, Yihao Wang<sup>2,3</sup>, Xiaoshan Zhang<sup>3</sup>, Peter Dörsch<sup>1</sup>, Jan Mulder<sup>1\*</sup>

<sup>1</sup>Department of Environmental Sciences, Norwegian University of Life Sciences, Postbox 5003, N-1432 Aas, Norway.

<sup>2</sup>Chongqing Academy of Forestry, 400036, Chongqing, China.

<sup>3</sup>Research Center for Eco-Environmental Sciences, Chinese Academy of Sciences, 100085, Beijing, China.

\*Correspondence: Jan Mulder, tel. +47 67231852, E-mail [jan.mulder@nmbu.no](mailto:jan.mulder@nmbu.no)

## Phosphorus adsorption by soil

The required dose of P to stimulate significant increase in soil P concentration was determined based on sorption isotherms (Singh et al., 2005). The experiment was carried out with soils (triplicates mixed within each block as one sample) in the O/A, AB and B-horizons, from each block. Briefly, 1 g dry and sieved (2 mm) soil was added to 30 ml CaCl<sub>2</sub> solution with a gradient of initial PO<sub>4</sub><sup>3-</sup> concentrations (0, 2.5, 5.0, 10.0, 20.0, 50.0 and 100 mg P L<sup>-1</sup>). Next, the suspension was shaken for 24 h at 20 °C. The P concentration was determined by colorimetric method (M&M) after centrifugation and filtration (0.45 µm). No P desorption was found in the zero-P treatments (only CaCl<sub>2</sub>).

The results of P adsorption isotherms (Table S1 and Fig. S8) indicated medium sorption capacities in TSP soils (Singh et al., 2005). Based on P affinity constant and adsorption maxima, we chose an optimum P concentration of 1.0 mg L<sup>-1</sup> for the P dose. Such dose is equivalent to 79.5 kg P ha<sup>-1</sup> in TSP soil (0.3 g P kg<sup>-1</sup> dw soil).

**Table S1** P adsorption maximum, affinity constant and maximum buffering capacity obtained from Langmuir isotherms. The linear equation is  $C / (x/m) = 1 / (kb) + C / b$ ; where C (mg P L<sup>-1</sup>) is the equilibrium P concentration; x/m (mg P kg<sup>-1</sup>) is the amount of P adsorbed per unit mass of adsorbent; k (L mg<sup>-1</sup> P) is the P affinity constant; b (mg P kg<sup>-1</sup>) is the P adsorption maximum.

|         |     | Adsorption maximum (b)<br>(mg P kg <sup>-1</sup> ) | P affinity constant (k)<br>(L mg <sup>-1</sup> P) | Maximum buffering capacity<br>(mbc) (L kg <sup>-1</sup> ) |
|---------|-----|----------------------------------------------------|---------------------------------------------------|-----------------------------------------------------------|
| Block 1 | O/A | 435                                                | 0.17                                              | 75                                                        |
|         | AB  | 303                                                | 0.20                                              | 62                                                        |
|         | B   | 278                                                | 1.00                                              | 277                                                       |
| Block 2 | O/A | 345                                                | 0.10                                              | 34                                                        |
|         | AB  | 182                                                | 0.27                                              | 49                                                        |
|         | B   | 278                                                | 0.24                                              | 65                                                        |
| Block 3 | O/A | 345                                                | 0.16                                              | 57                                                        |
|         | AB  | 278                                                | 0.26                                              | 73                                                        |
|         | B   | 357                                                | 0.28                                              | 99                                                        |

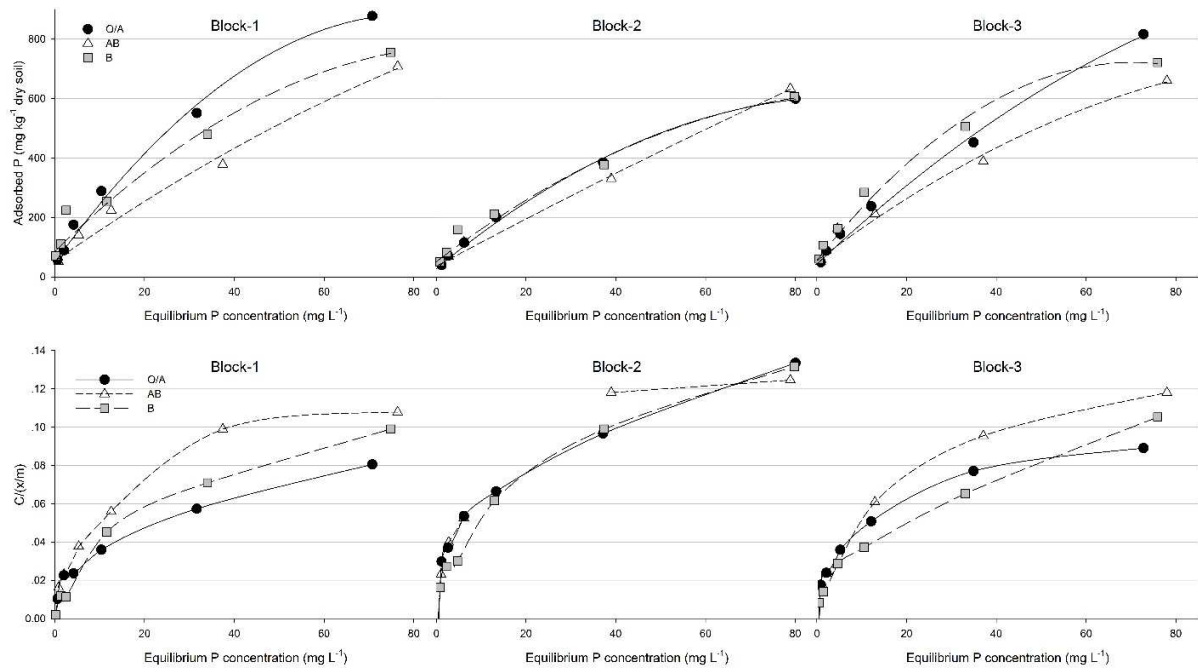

**Fig. S1** Langmuir adsorption isotherms of soils from O/A, AB and B horizons in Block 1-3. The data were fitted to the Langmuir equation, after linearization.

**Table S2** Na<sup>+</sup> concentration in soil water at 5- and 20-cm depths in the Reference and P treatments. Values are means and standard deviations (in brackets) (n = 9).

| Sampling date         | Na <sup>+</sup> concentration at 5 cm (mg L <sup>-1</sup> ) |             | Na <sup>+</sup> concentration at 20 cm (mg L <sup>-1</sup> ) |             |
|-----------------------|-------------------------------------------------------------|-------------|--------------------------------------------------------------|-------------|
|                       | Ref                                                         | P           | Ref                                                          | P           |
| 14/06/18 <sup>†</sup> | 0.68 (0.58)                                                 | 5.19 (3.15) | 1.31 (0.98)                                                  | 3.15 (2.38) |
| 14/09/21              | 0.54 (0.50)                                                 | 2.01 (0.86) | 0.83 (0.91)                                                  | 3.00 (1.33) |
| 15/01/13              | 0.69 (0.31)                                                 | 1.39 (0.50) | 1.10 (0.68)                                                  | 2.97 (1.65) |
| 15/10/07              | 0.52 (0.36)                                                 | 0.56 (0.65) | 0.53 (0.34)                                                  | 1.09 (1.25) |

<sup>†</sup> One month after P application (14/05/04).

**Table S3** Half-yearly tree biomass, 500-needle weight and needle nutrient contents in Reference and P treatments<sup>†</sup>. Values are means and standard deviations (in brackets) (n = 9).

|           |     | 500-<br>needle<br>g | Tree<br>Biomass<br>s t ha <sup>-1</sup> | Total C<br>g kg <sup>-1</sup> | Total N<br>g kg <sup>-1</sup> | Total P<br>g kg <sup>-1</sup> | C/N       | N/P       | K<br>g kg <sup>-1</sup> | Mg<br>g kg <sup>-1</sup> | Ca<br>g kg <sup>-1</sup> |
|-----------|-----|---------------------|-----------------------------------------|-------------------------------|-------------------------------|-------------------------------|-----------|-----------|-------------------------|--------------------------|--------------------------|
| Nov. 2013 | Ref | 13.8<br>(1.8)       | 149<br>(11)                             | 510<br>(9)                    | 15.2<br>(0.8)                 | 0.71<br>(0.04)                | 34<br>(2) | 22<br>(1) | 4.6<br>(0.8)            | 1.3<br>(0.2)             | 4.5<br>(1.3)             |
|           | P   | 12.5<br>(1.9)       | 131<br>(25)                             | 517<br>(6)                    | 14.7<br>(1.0)                 | 0.73<br>(0.05)                | 35<br>(2) | 20<br>(3) | 4.7<br>(0.7)            | 1.4<br>(0.2)             | 5.3<br>(0.6)             |
| Nov. 2014 | Ref | 13.8<br>(2.3)       | 148<br>(12)                             | 551<br>(11)                   | 14.9<br>(1.5)                 | 0.88<br>(0.09)                | 37<br>(7) | 17<br>(1) | 6.6<br>(1.2)            | 1.6<br>(0.3)             | 7.8<br>(2.4)             |
|           | P   | 14.3<br>(2.3)       | 133<br>(27)                             | 550<br>(9)                    | 14.6<br>(1.1)                 | 0.85<br>(0.11)                | 38<br>(4) | 17<br>(1) | 5.9<br>(0.9)            | 1.6<br>(0.4)             | 5.6<br>(3.1)             |
| Feb. 2016 | Ref | 12.9<br>(2.3)       | 143<br>(8)                              | - <sup>*</sup>                | -                             | -                             | -         | -         | -                       | -                        | -                        |
|           | P   | 10.8<br>(2.4)       | 129<br>(29)                             | -                             | -                             | -                             | -         | -         | -                       | -                        | -                        |

<sup>†</sup> P addition was conducted on 14/05/04

\* Data were not available.

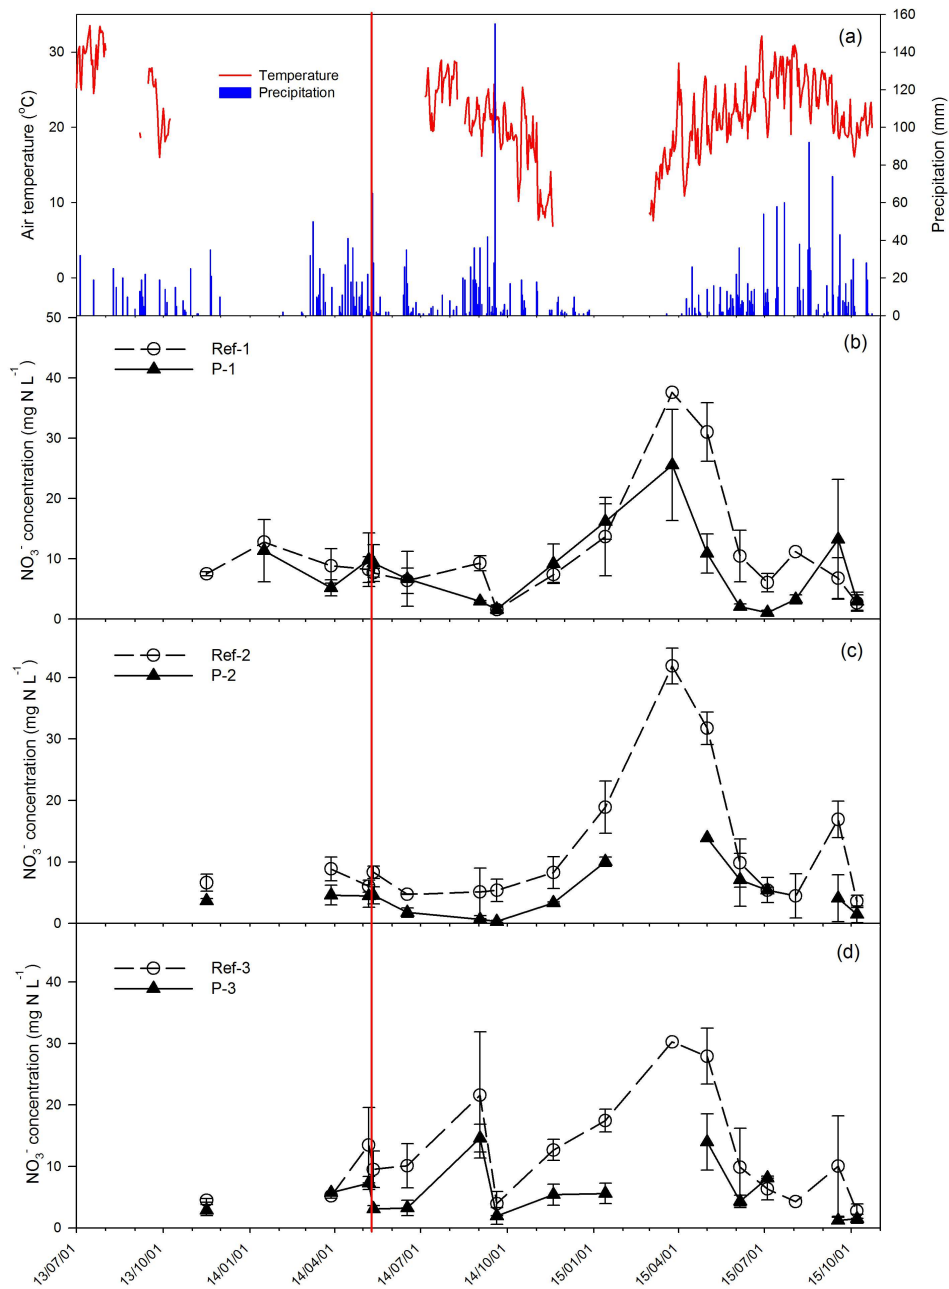

**Fig. S2** Daily mean air temperature and precipitation (a), and monthly mean NO<sub>3</sub><sup>-</sup> concentrations at the 5-cm soil depth for three blocks (b-d) with Reference and P treatments during two years; the red line refers to the date when P addition was conducted (for P treatments only).

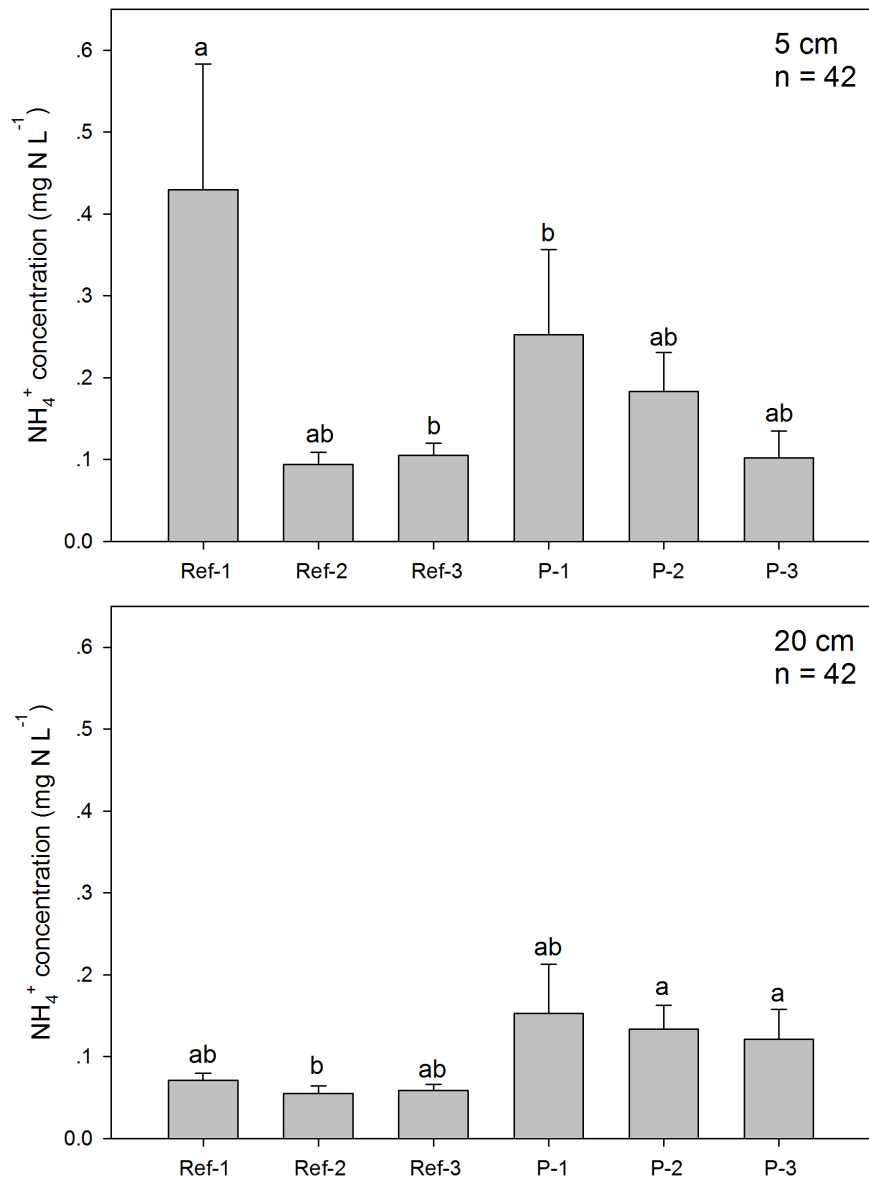

**Fig. S3** Mean  $\text{NH}_4^+$ -N concentrations in soil water at 5 (a) and 20 (b) cm depths from three blocks with Reference and P treatments, 1.5 years after P addition; the small letters indicate the significance levels among the treatments and blocks.

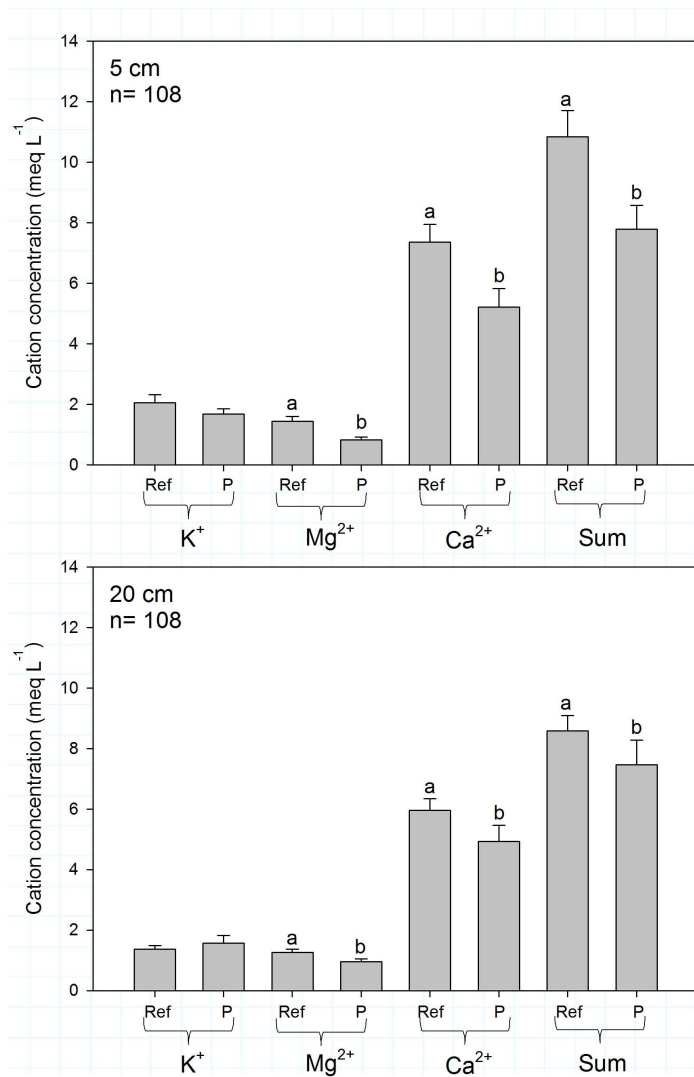

**Fig. S4** Mean soil cation (K<sup>+</sup>, Mg<sup>2+</sup> and Ca<sup>2+</sup>) concentrations in Reference and P treatments during 1.5 years after P addition



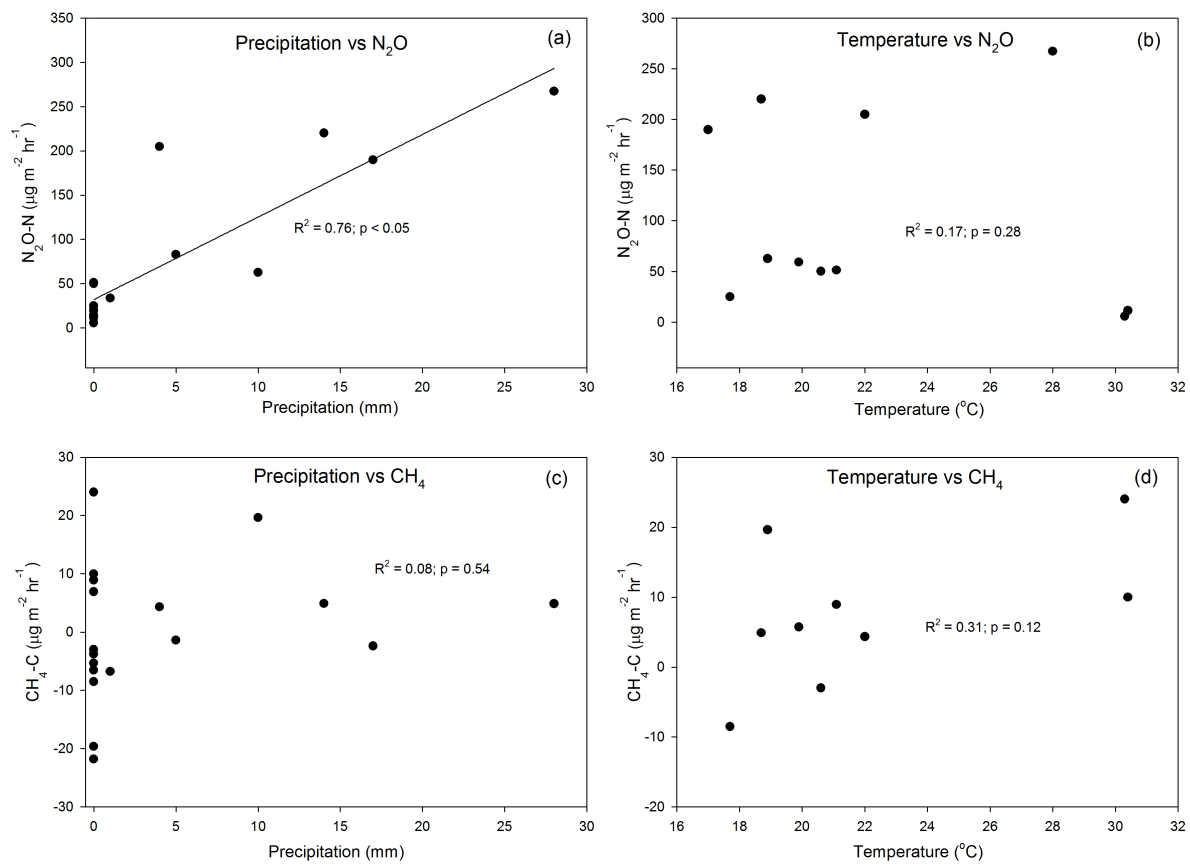

**Fig. S5** Relationship between climatic factors (daily mean temperature and precipitation) and gas fluxes (mean monthly fluxes for N<sub>2</sub>O (a&b) and CH<sub>4</sub> (c&d) from the References); due to temperature data missing from November 2013 to July 2014, fewer data points were presented in comparisons with temperature.

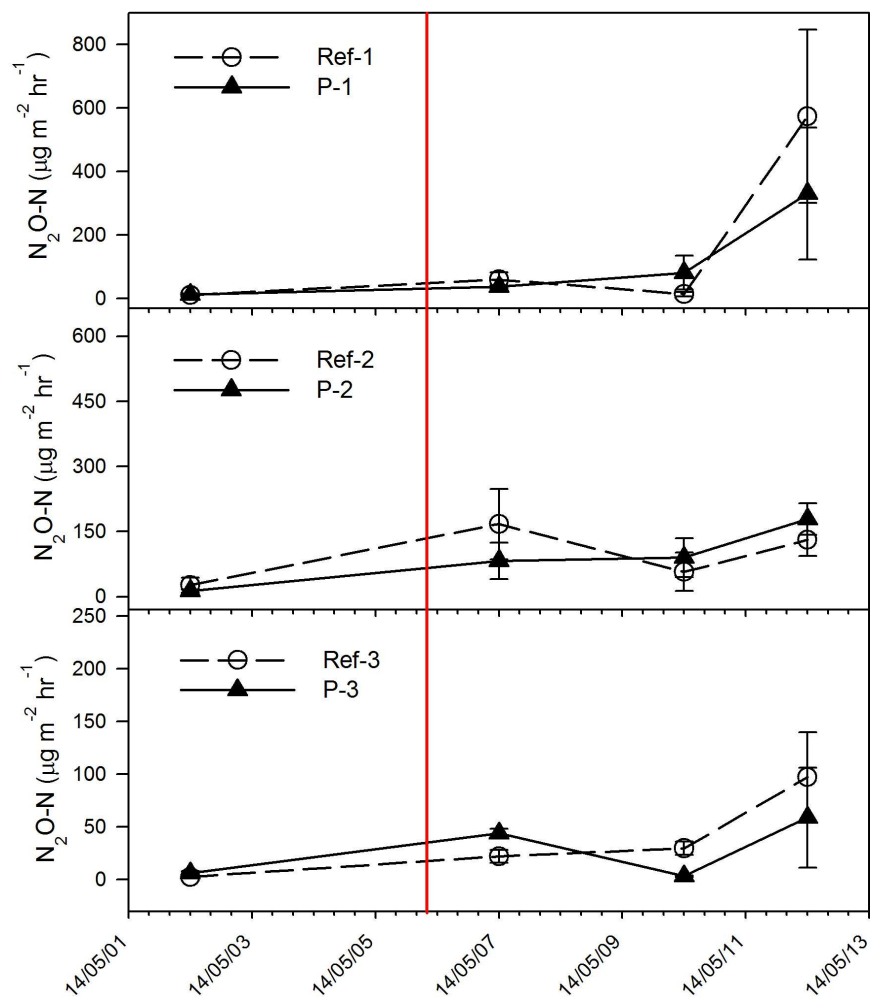

**Fig. S6** Mean  $N_2O$  fluxes for three blocks in the Reference and P treatments during the 10 days before and after P application on 4 May 2014.

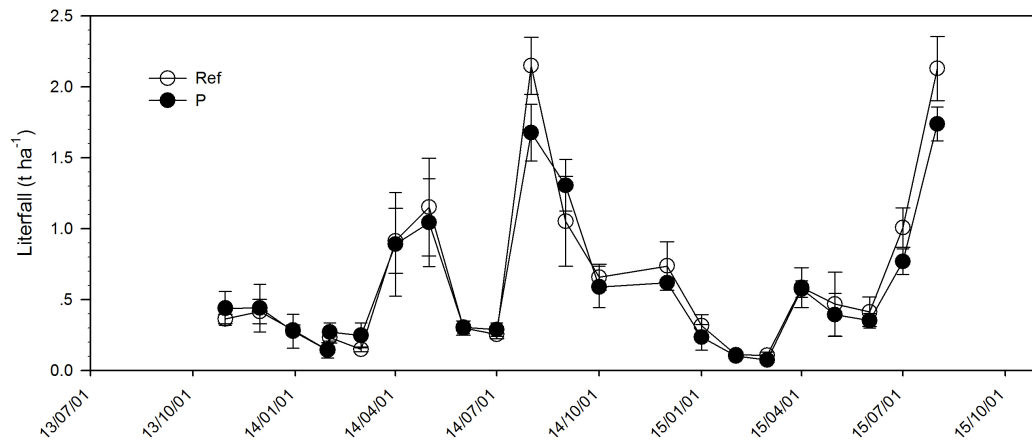

**Fig. S7** Monthly litterfall for three blocks (a-c) with Reference and P treatments during two years.

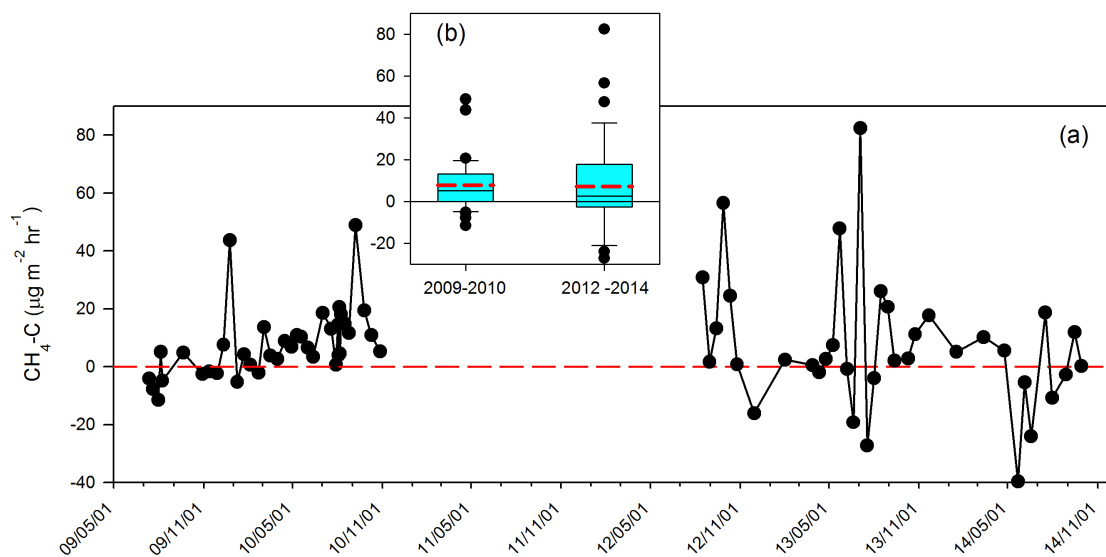

**Fig. S8** (a) Temporal variations of CH<sub>4</sub> fluxes from 2009 to 2014 at TSP forest; red dash line refers to the zero flux; (b) Box whisker plots of mean CH<sub>4</sub> fluxes for 2009-2012 and 2012-2014 periods, respectively; red dash lines refer to the mean values. Data for long-term CH<sub>4</sub> fluxes were obtained from Zhu et al. (unpublished).
